# Supplementary material
Source: publisher site journal article supplement (https://www.dovepress.com/article/335364)
Supplement: Supplementary file 1 [file get_supplementary_file.php]

SUPPLEMENTARY MATERIAL

S**upplementary Tables**

**Supplementary Table 1.** **Gravidity and Parity according to HSI quartiles**

| Variables | Quartile 1 | Quartile 2 | Quartile 3 | Quartile 4 | *P* for linear trend |
| --- | --- | --- | --- | --- | --- |
| n | 267 | 274 | 271 | 270 | - |
| HSI range | ≤25.92 | 25.93-28.45 | 28.46-31.78 | ≥31.79 | - |
| Gravidity |  |  |  |  | 0.054 |
| 1 | 157(58.8%) | 142(51.8%) | 132(48.7%) | 137(50.7%) |  |
| 2 | 61(22.8%) | 80(29.2%) | 87(32.1%) | 71(26.3%) |  |
| ≥3 | 49(18.4%) | 52(19%) | 52(19.2%) | 62(23%) |  |
| Parity |  |  |  |  | 0.080 |
| 0 | 202(75.7%) | 186(67.9%) | 179(66.1%) | 183(67.8%) |  |
| 1 | 59(22.1%) | 88(32.1%) | 88(32.5%) | 84(31.1%) |  |
| ≥2 | 6(2.2%) | 0(0%) | 4(1.5%) | 3(1.1%) |  |

Data are presented as number(%)

**Supplementary Table 2. Glucose concentration at three time points during OGTT, incidence of GDM, LGA and SGA according to the originally proposed HSI cutoffs**

| Variables | Group 1 | Group 2 | Group3 | *P* for linear trend |
| --- | --- | --- | --- | --- |
| n | 687 | 295 | 100 | - |
| HSI range | <30 | 30-36 | >36 | - |
| OGTT(mmol/L) |  |  |  |  |
| FBG | 4.63(4.40,4.85) | 4.76(4.49,5.06) | 4.76(4.49,5.06) | <0.001 |
| 1-hBG | 7.36(6.35,8.40) | 7.92(6.86,9.02) | 8.29(7.03,9.27) | <0.001 |
| 2-hBG | 6.28(5.59,7.15) | 6.91(6.08,7.74) | 6.93(5.92,8.08) | <0.001 |
| GDM | 104(15.1%) | 95(32.2%) | 40(40%) | <0.001 |
| n | 513 | 228 | 85 |  |
| Birth weight(g) | 3270(2980,3520) | 3370(3070,3650) | 3380(3150,3610) | 0.004 |
| LGA | 43(8.4%) | 34(14.9%) | 10(11.8%) | 0.043 |
| SGA | 38(7.4%) | 10(4.4%) | 2(2.4%) | 0.029 |

Data are presented as median(interquartile range) or number(%)

Abbreviations: HSI, hepatic steatosis index; OGTT, oral glucose tolerance test; FBG, fasting blood glucose; GDM, gestational diabetes mellitus; LGA, large for gestational age; SGA, small for gestational age

**Supplementary Table 3. The Comparison of Area Under Curve (AUC) between HSI and other indices for GDM and LGA Infant**

Abbreviations: GDM, gestational diabetes mellitus; LGA, large for gestational age; HSI, hepatic steatosis index; NAFLD, non-alcoholic fatty liver disease; TG/HDL-C, triglyceride/high-density lipoprotein cholesterol; TyG, triglyceride-glucose index

| Variables | GDM | | | LGA | |
| --- | --- | --- | --- | --- | --- |
| Z statistic | *P* Value | Z statistic | | *P* value |
| HSI | - | - | - | | - |
| NAFLD liver fat score | 0.612 | 0.54 | 1.202 | | 0.23 |
| TG/HDL-C | 0.870 | 0.38 | 1.638 | | 0.10 |
| TyG | 0.255 | 0.80 | 0.940 | | 0.35 |

**Supplementary Figures**

**
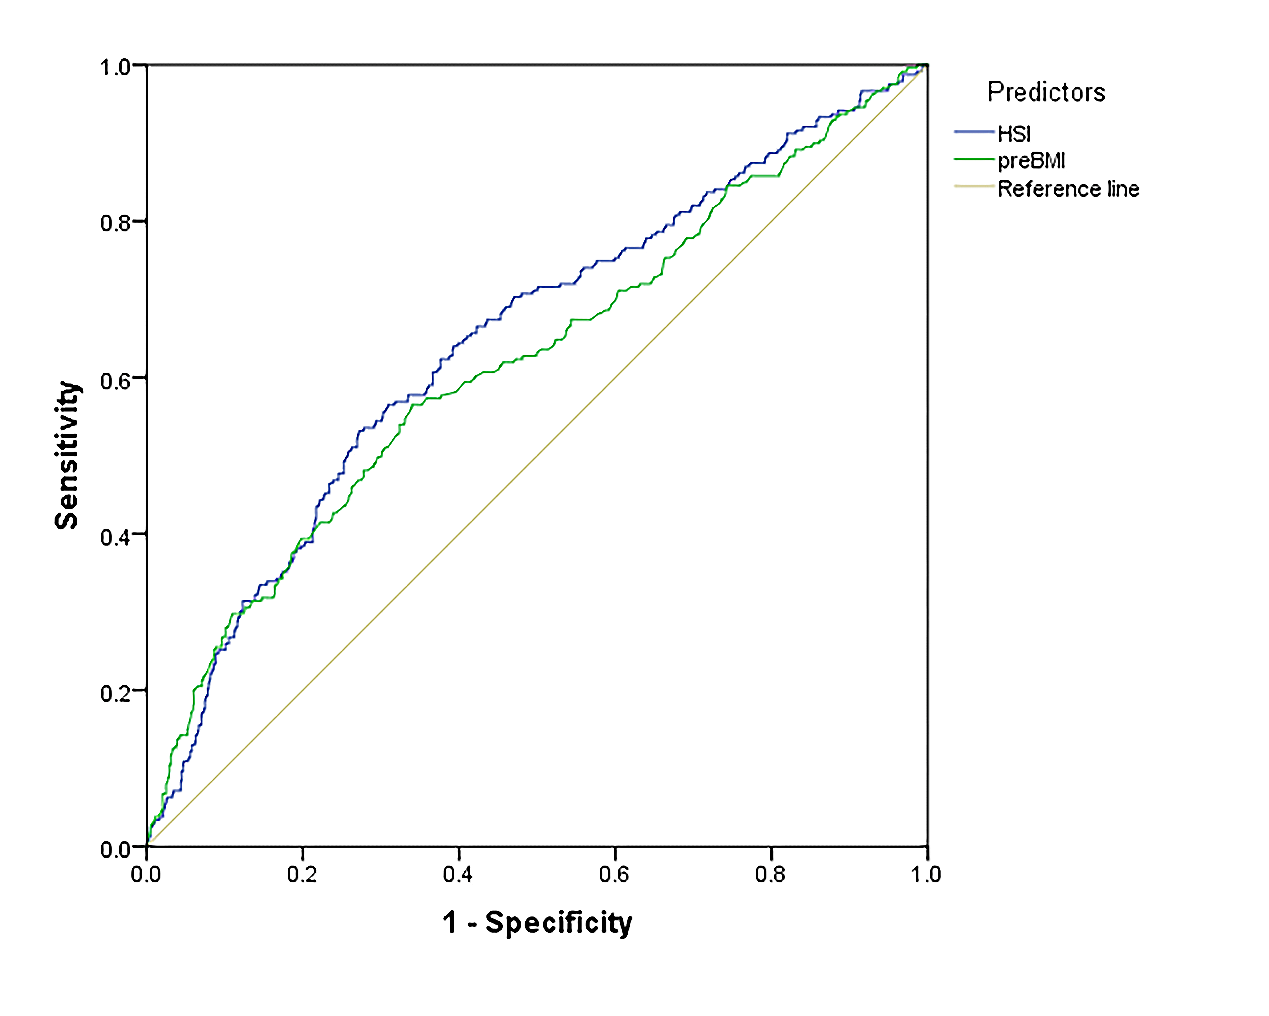
**

**Supplementary Figure 1**. **Receiver operating characteristic (ROC) curves of HSI and preBMI used to predict GDM**

The area under the curve(AUC) and 95% confidence Interval(CI) of HSI and pre-pregnancy body mass index (preBMI) were 0.646(0.605-0.686,*P*<0.001) and 0.619(0.577-0.661,*P*<0.001), respectively.

**
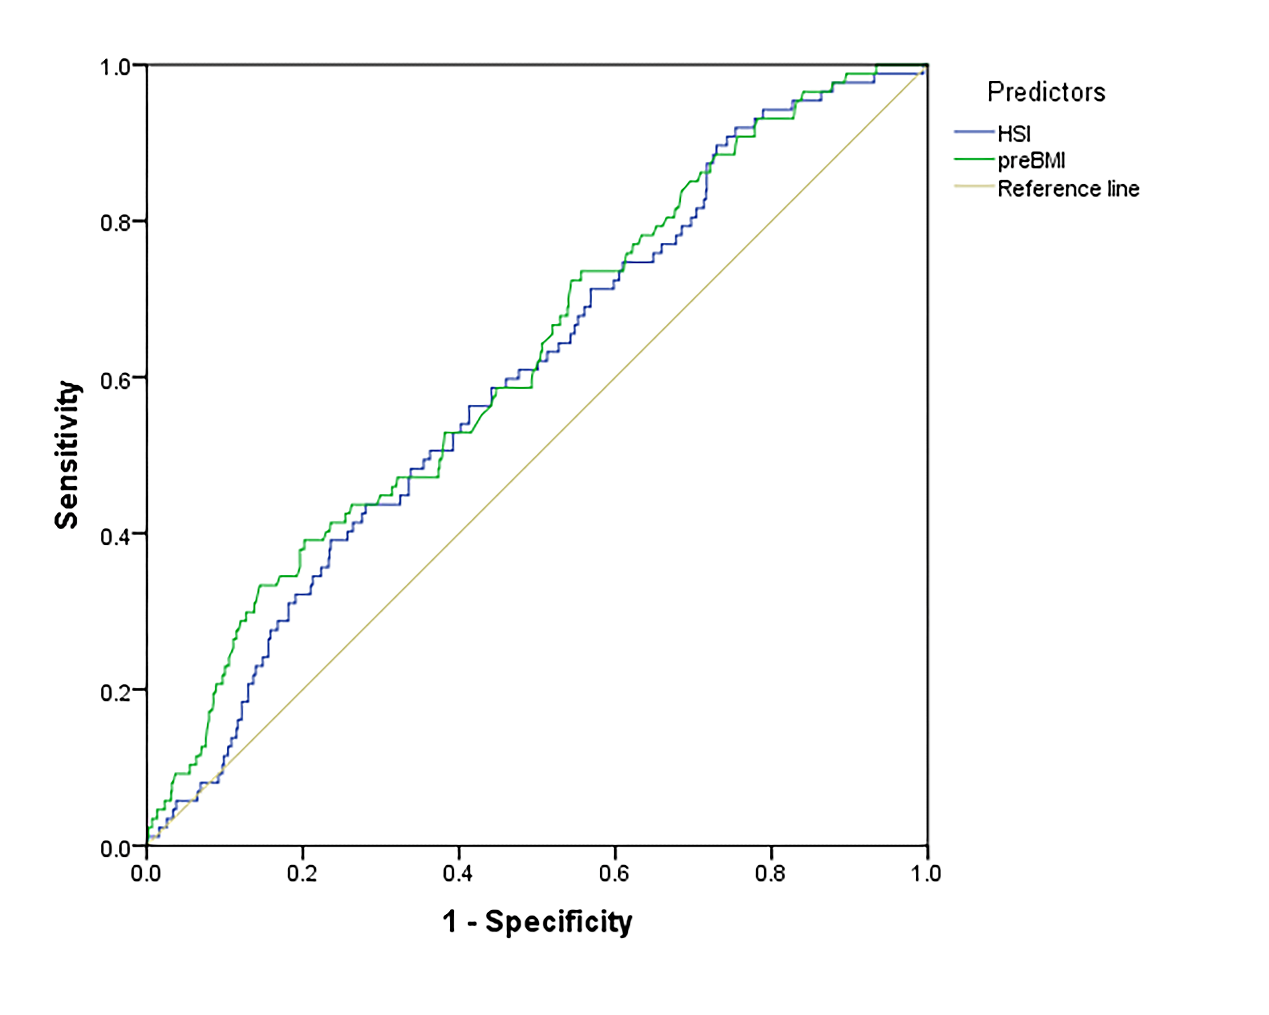
**

**Supplementary Figure 2**. **Receiver operating characteristic (ROC) curves of HSI and preBMI used to predict LGA infant**

The area under the curve(AUC) and 95% confidence Interval(CI) of HSI and pre-pregnancy body mass index (preBMI) were 0.600(0.541-0.660,*P*=0.002) and 0.622(0.562-0.683,*P*<0.001), respectively.

**
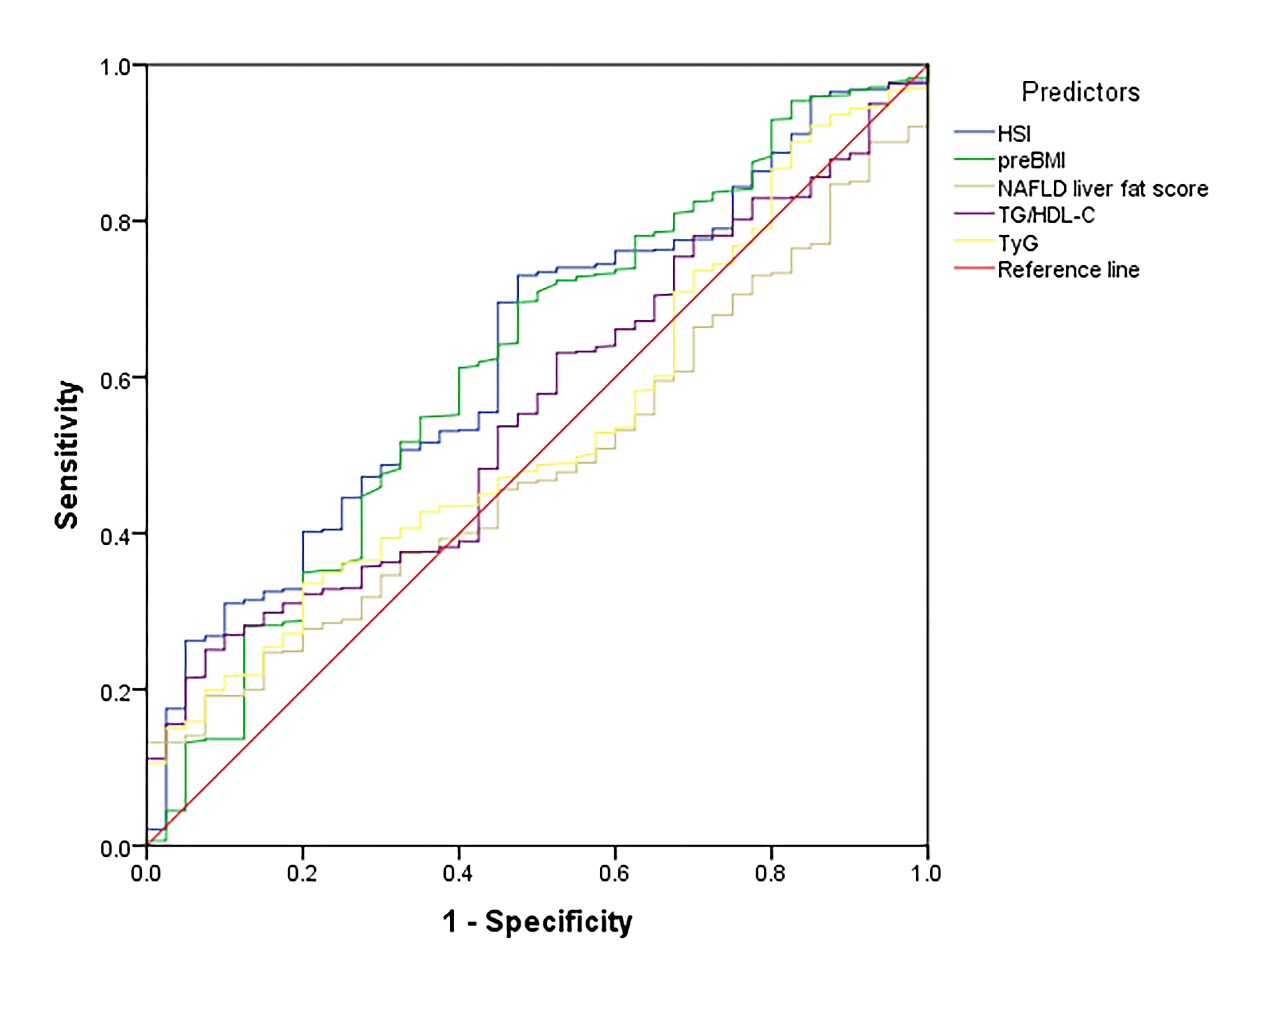
**

**Supplementary Figure 3**. **Receiver operating characteristic (ROC) curves of HSI and other indices used to predict non-SGA**

The area under the curve(AUC) and 95% confidence Interval(CI) of HSI, preBMI, NAFLD liver fat score, TG/HDL-C and TyG were 0.630(0.548-0.712,*P*=0.006), 0.615(0.523-0.707,*P*=0.014), 0.489(0.412-0.566,*P*=0.818), 0.559(0.477-0.640,*P*=0.213) and 0.535(0.452-0.619,*P*=0.450), respectively.
